# Supplementary material for: Community detection with attributed random walk via seed replacement
Source: Springer Nature journal article supplement (doi:10.1007/s11704-021-0482-x), 2022-01-07
Supplement: 11704_2021_482_MOESM1_ESM.pdf [file 11704_2021_482_MOESM1_ESM.pdf]

# Community Detection with Attributed Random Walk via Seed Replacement

Yang CHANG, Huifang MA, Liang  
CHANG,Zhixin LI

Frontiers of Computer Science,DOI:10.1007/s11704-021-0482-x

# Problems & ideas

- Problems: 1) It is not easy to detect high-quality seed nodes and obtain their membership with communities in attributed graph.  
2) There are few ways to treat attributes as nodes to perform random walk .
- Ideas: 1) Through a series of seed selection strategies, a high-quality set of seed nodes can be selected and their membership with communities can be obtained.  
2) A bipartite graph is constructed in which attributes are regarded as nodes. And a transition matrix with fusion of structure-attribute is generated, which improves the accuracy and efficiency of subsequent community detection.

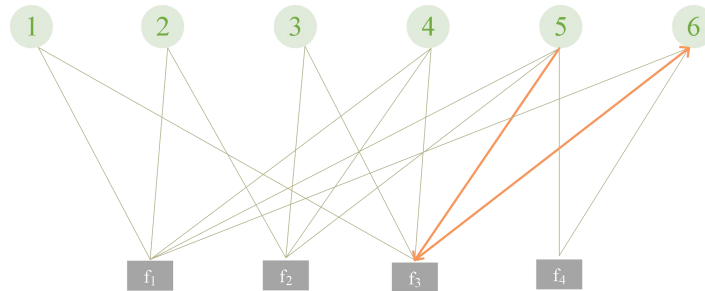

**A toy example of bipartite graph**

# Main Contributions

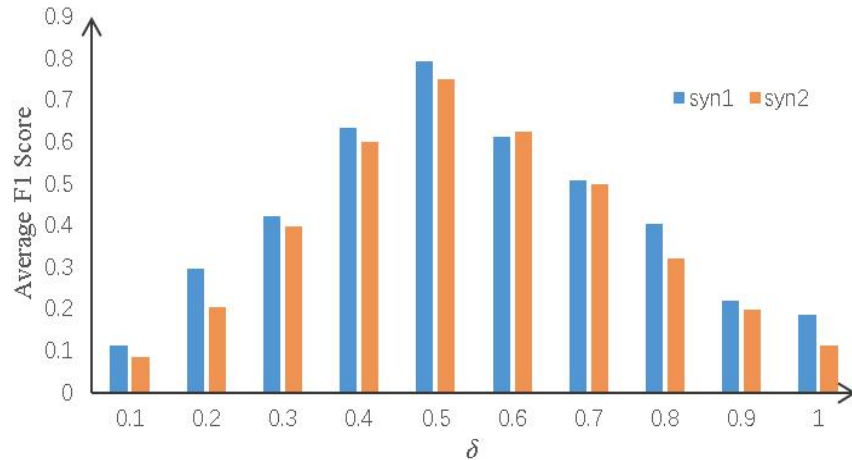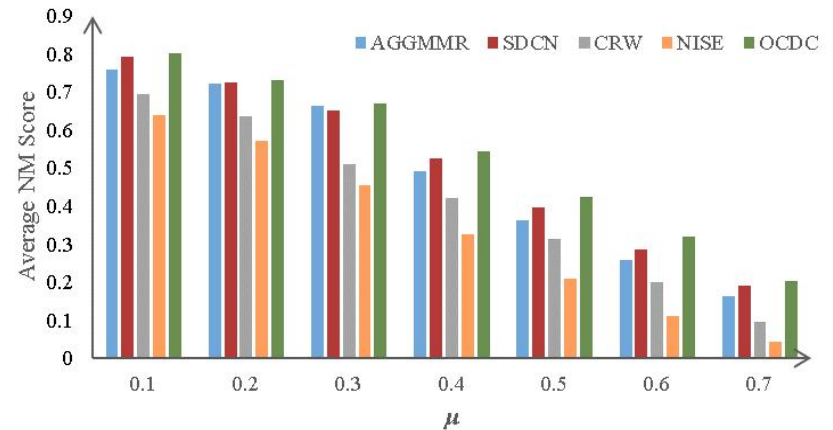

- We have presented an effective strategy, which not only find the better-quality seed sets but also obtain the seed replacement path set.
- We have explored the potential interaction between attributes and structure of a node. A bipartite network is generated and the nodes interaction transition matrix is obtained, which propel the random walks more diverse.
